# Supplementary material
Source: PubMed Central journal article supplement (PMC3733243)
Supplement: NIHMS466422-supplement-supplementary_figure_1.pdf [file NIHMS466422-supplement-supplementary_figure_1.pdf]

# RNA Metrics by Slide Storage Length

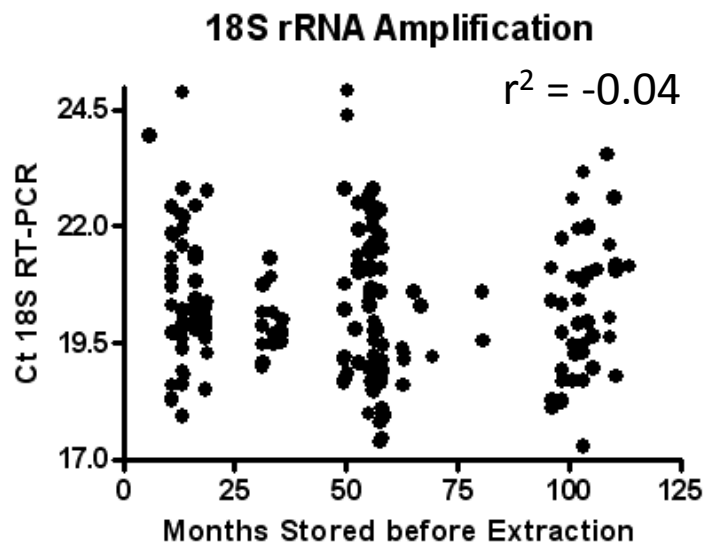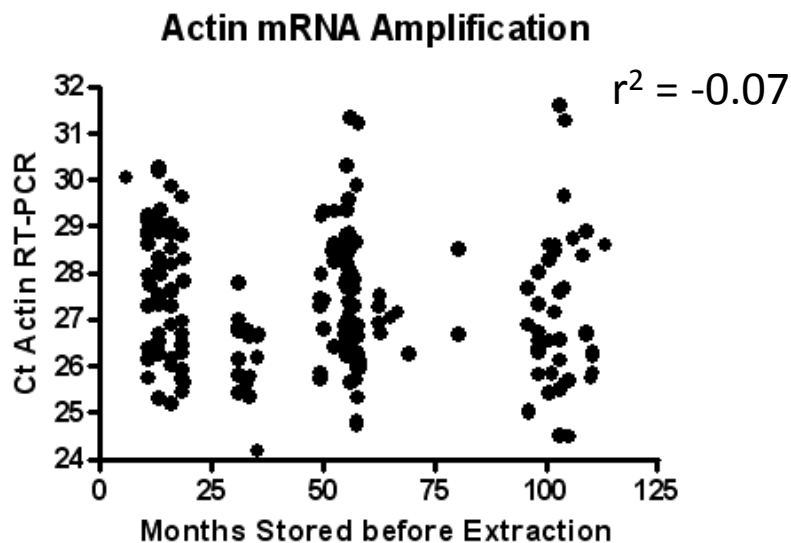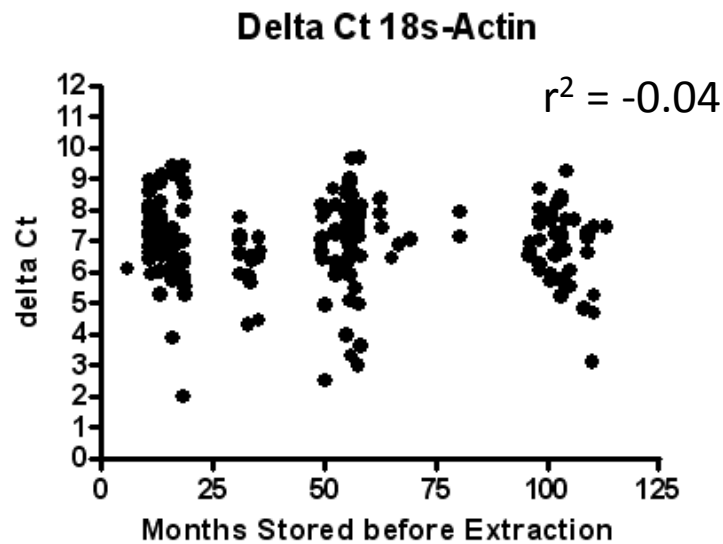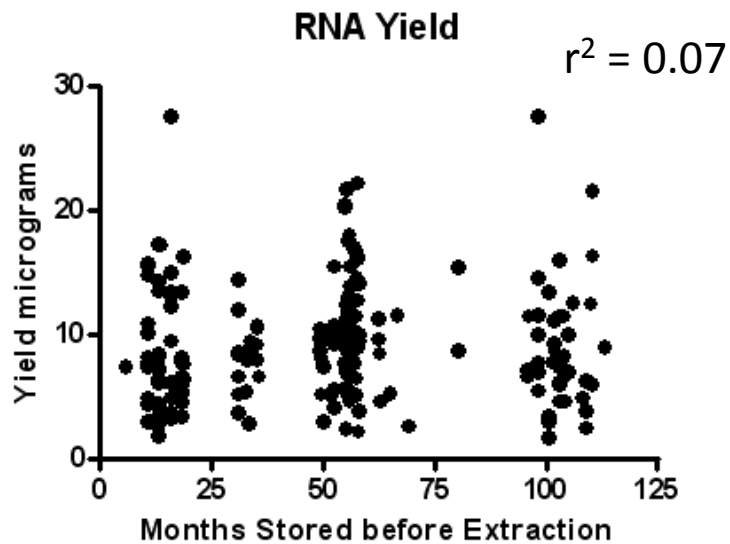

**Supplemental Figure 1:** Distribution of RNA quality metrics by time of slide storage before the RNA was extracted. The Ct (crossing threshold of the PCR amplification) values for RT-PCR of the 18S rRNA and beta-actin (ACTB) show that there is no trend towards longer amplifications based on slide storage. A comparison of the two PCR reactions (delta Ct) also does not show a correlation. Finally, overall RNA yield also was not correlated with slide storage. All of the correlation coefficient are not significant.
